# Supplementary material for: iTRAQ-Based Proteomic Analyses of Regulation of Isothiocyanate and Endogenous Selenium Metabolism in Broccoli Sprouts by Exogenous Sodium Selenite
Source: MDPI journal article supplement (doi:10.3390/foods12071397), 2023-03-25
Supplement: s1 [file s1]

**Table S1** Differentially abundant proteins in 4-day-old broccoli sprouts under exogenous selenium treatments

| Accession No. <sup>a</sup>     | Description <sup>b</sup>                                               | Se/C      | Cove <sup>c</sup> | MW (kDa) <sup>d</sup> | TpId <sup>e</sup> |
|--------------------------------|------------------------------------------------------------------------|-----------|-------------------|-----------------------|-------------------|
| <b>Carbohydrate metabolism</b> |                                                                        |           |                   |                       |                   |
| Q9SJU4                         | Fructose-bisphosphate aldolase 1, chloroplastic                        | 2.27±0.13 | 21.55             | 42.9                  | 6.58              |
| Q9SAU2                         | D-ribulose-5-phosphate-3-epimerase                                     | 1.83±0.24 | 5.69              | 29.99                 | 8.07              |
| Q56Z99                         | Alpha-xylosidase (Fragment)                                            | 1.93±0.45 | 10.96             | 8.08                  | 5.38              |
| Q9M1D3                         | Citrate synthase 5, mitochondrial                                      | 2.31±0.20 | 7.76              | 51.69                 | 6.67              |
| Q9LXL5                         | Sucrose synthase 4                                                     | 1.91±0.07 | 2.85              | 92.94                 | 6.57              |
| Q9LIF9                         | Beta-glucosidase 19                                                    | 2.30±0.11 | 2.47              | 59.98                 | 6.65              |
| Q9FNN1                         | Pyruvate kinase                                                        | 2.76±0.18 | 2.16              | 54.94                 | 6.29              |
| Q9C9C4                         | Enolase 1, chloroplastic                                               | 1.90±0.06 | 3.77              | 51.44                 | 6.13              |
| Q9C8T3                         | Ribulose-phosphate 3-epimerase                                         | 1.96±0.10 | 7.93              | 24.1                  | 6.1               |
| Q9C6Z3                         | Pyruvate dehydrogenase E1 component subunit beta-2, chloroplastic      | 1.77±0.21 | 2.46              | 44.22                 | 6.35              |
| Q9C524                         | Probable fructokinase-6, chloroplastic                                 | 1.91±0.28 | 7.03              | 41.45                 | 5.77              |
| Q8W112                         | Beta-D-glucan exohydrolase-like protein                                | 2.09±0.20 | 15.71             | 67.88                 | 9.13              |
| Q8RX86                         | Alpha-galactosidase 2                                                  | 2.03±0.12 | 4.8               | 44.01                 | 7.64              |
| Q8LJP5                         | Isocitrate dehydrogenase [NADP], chloroplastic/mitochondrial           | 1.89±0.14 | 5.98              | 54.16                 | 7.97              |
| Q5E924                         | Glyceraldehyde-3-phosphate dehydrogenase GAPCP2, chloroplastic         | 2.14±0.01 | 7.38              | 44.82                 | 8.62              |
| P25856                         | Glyceraldehyde-3-phosphate dehydrogenase GAPA1, chloroplastic          | 2.19±0.1  | 26.52             | 42.46                 | 7.75              |
| O64688                         | Pyruvate dehydrogenase E1 component subunit beta-3, chloroplastic      | 1.77±0.21 | 2.46              | 43.99                 | 5.8               |
| O04499                         | 2,3-bisphosphoglycerate-independent phosphoglycerate mutase 1          | 2.14±0.07 | 5.92              | 60.54                 | 5.53              |
| O04309                         | Jacalin-related lectin 35                                              | 1.94±0.06 | 6.21              | 48.47                 | 5.26              |
| F4KC24                         | Xylose isomerase                                                       | 2.18±0.19 | 27.18             | 32.39                 | 7.75              |
| F4J6T7                         | Putative alpha-xylosidase 2                                            | 2.00±0.01 | 2.3               | 97.39                 | 6.62              |
| F4J0U9                         | Dicarboxylate diiron protein, putative (Crd1)                          | 2.30±0.27 | 3.01              | 39.15                 | 6.44              |
| F4IGL7                         | Fructose-bisphosphate aldolase                                         | 2.27±0.13 | 18.65             | 33.3                  | 6.8               |
| F4IGL5                         | Fructose-bisphosphate aldolase                                         | 2.27±0.13 | 20.05             | 41.78                 | 6.28              |
| F4I3L1                         | Phosphoglycerate kinase                                                | 2.29±0.03 | 14.81             | 42.59                 | 5.54              |
| F4I035                         | RNA 3'-terminal phosphate cyclase/enolpyruvate transferase, alpha/beta | 1.79±0.23 | 3.07              | 52.37                 | 5.99              |
| B9DHM5                         | Pyruvate, phosphate dikinase                                           | 2.14±0.16 | 9.14              | 95.33                 | 5.52              |
| A0A1P8BG25                     | Glycosyl hydrolase family protein                                      | 2.09±0.20 | 13.96             | 77.11                 | 9.32              |
| A0A1P8BF93                     | Beta-D-xylosidase 4                                                    | 1.88±0.04 | 6.87              | 67.23                 | 7.12              |
| A0A1P8B2D5                     | Beta glucosidase 15                                                    | 2.30±0.09 | 2.25              | 40.18                 | 7.94              |
| A0A1P8B1I3                     | Malic enzyme                                                           | 1.96±0.17 | 5.39              | 52.89                 | 6.58              |

|                              |                                                                                                                    |           |       |        |      |
|------------------------------|--------------------------------------------------------------------------------------------------------------------|-----------|-------|--------|------|
| A0A1I9LSJ6                   | Citrate synthase                                                                                                   | 2.31±0.20 | 7.68  | 52.37  | 6.67 |
| A0A1I9LSJ5                   | Citrate synthase                                                                                                   | 2.31±0.20 | 5.69  | 46.81  | 6.29 |
| A0A1I9LQM9                   | Mannose-binding lectin superfamily protein                                                                         | 1.94±0.06 | 4.71  | 31.96  | 5.55 |
| A0A178WMK4                   | VI2                                                                                                                | 1.89±0.37 | 2.17  | 45.52  | 5.08 |
| A0A178WIN0                   | PDH-E1 BETA                                                                                                        | 1.77±0.21 | 2.46  | 44.23  | 6.35 |
| A0A178W4Q1                   | Phosphoglycerate kinase                                                                                            | 2.29±0.03 | 12.55 | 49.91  | 8.27 |
| A0A178UUU3                   | Glucose-6-phosphate isomerase                                                                                      | 2.04±0.12 | 3.26  | 67.01  | 5.69 |
| A0A178U7B3                   | Alpha-galactosidase                                                                                                | 2.03±0.12 | 4.46  | 47.23  | 7.64 |
| A0A178WLI5                   | PDH-E1 BETA                                                                                                        | 1.77±0.21 | 3.26  | 33.75  | 5.9  |
| <b>Amino acid metabolism</b> |                                                                                                                    |           |       |        |      |
| Q9ZPS3                       | Glutamate decarboxylase 4                                                                                          | 2.08±0.34 | 7.1   | 55.97  | 6.34 |
| Q9SZX3                       | Argininosuccinate synthase, chloroplastic                                                                          | 2.05±0.04 | 4.66  | 53.81  | 6.67 |
| Q9SS45                       | Phenylalanine ammonia-lyase 4                                                                                      | 1.98±0.17 | 1.98  | 76.87  | 6.27 |
| Q9SRV5                       | 5-methyltetrahydropteroyltriglutamate--homocysteine methyltransferase 2                                            | 2.17±0.20 | 18.43 | 84.53  | 6.51 |
| Q9S6Z7                       | Bifunctional L-3-cyanoalanine synthase/cysteine synthase D1                                                        | 2.25±0.08 | 3.4   | 34.27  | 5.34 |
| Q9M401                       | Branched-chain-amino-acid aminotransferase 3, chloroplastic                                                        | 2.43±0.02 | 2.42  | 44.94  | 8.1  |
| Q9LYT7                       | 3-isopropylmalate dehydratase small subunit 2                                                                      | 1.92±0.11 | 5.14  | 27.19  | 6.87 |
| Q9LTB2                       | Methionine S-methyltransferase                                                                                     | 2.13±0.44 | 4.3   | 118.64 | 5.63 |
| Q9LT69                       | D-3-phosphoglycerate dehydrogenase 3, chloroplastic                                                                | 1.79±0.01 | 1.7   | 62.08  | 8.24 |
| Q9LR30                       | Glutamate--glyoxylate aminotransferase 1                                                                           | 2.16±0.04 | 16.84 | 53.27  | 6.89 |
| Q9LK08                       | 3-hydroxyisobutyryl-CoA hydrolase-like protein 4, mitochondrial                                                    | 2.01±0.20 | 2.87  | 45.71  | 6.46 |
| Q9LJA0                       | Putative inactive cysteine synthase 2                                                                              | 2.13±0.01 | 15.96 | 19.63  | 7.93 |
| Q9FYA6                       | Branched-chain-amino-acid aminotransferase 5, chloroplastic                                                        | 2.43±0.02 | 2.41  | 45.55  | 7.87 |
| Q9FL98                       | Glutathione S-transferase family protein                                                                           | 1.74±0.10 | 2.57  | 40.59  | 5.59 |
| Q9FL95                       | At5g45020/K21C13_21                                                                                                | 1.74±0.10 | 2.77  | 37.32  | 6.33 |
| Q9C550                       | 2-isopropylmalate synthase 2, chloroplastic                                                                        | 2.33±0.19 | 4.6   | 68.09  | 6.37 |
| Q8H107                       | Dihydrolipoyllysine-residue succinyltransferase component of 2-oxoglutarate dehydrogenase complex 2, mitochondrial | 1.94±0.16 | 1.51  | 50.03  | 9.09 |
| Q56YA5                       | Serine--glyoxylate aminotransferase                                                                                | 1.74±0.07 | 8.48  | 44.18  | 7.83 |
| Q43725                       | Cysteine synthase, mitochondrial                                                                                   | 2.43±0.17 | 9.3   | 45.79  | 8.18 |
| Q43127                       | Glutamine synthetase, chloroplastic/mitochondrial                                                                  | 2.22±0.08 | 13.26 | 47.38  | 6.87 |
| Q42521                       | Glutamate decarboxylase 1                                                                                          | 1.68±0.01 | 6.97  | 57.03  | 5.53 |
| Q1H5A3                       | Glutamate dehydrogenase                                                                                            | 2.41±0.10 | 9.73  | 44.5   | 6.86 |
| P45725                       | Phenylalanine ammonia-lyase 3                                                                                      | 1.98±0.12 | 2.02  | 76.19  | 6.51 |
| P45724                       | Phenylalanine ammonia-lyase 2                                                                                      | 2.13±0.05 | 1.95  | 77.81  | 6.46 |

|                         |                                                                                                                  |           |       |        |      |
|-------------------------|------------------------------------------------------------------------------------------------------------------|-----------|-------|--------|------|
| O82796                  | Phosphoserine phosphatase, chloroplastic                                                                         | 2.12±0.25 | 3.39  | 32.3   | 6.38 |
| O82782                  | 1-(5-phosphoribosyl)-5-[(5-phosphoribosylamino)methylideneamino]imidazole-4-carboxamide isomerase, chloroplastic | 1.93±0.10 | 2.63  | 33.34  | 7.06 |
| O80988                  | Glycine dehydrogenase (decarboxylating) 2, mitochondrial                                                         | 2.02±0.02 | 0.77  | 113.7  | 6.65 |
| O50008                  | 5-methyltetrahydropteroyltriglutamate-homocysteine methyltransferase 1                                           | 2.06±0.06 | 23.27 | 84.3   | 6.51 |
| F4KBV0                  | Transcriptional coactivator/pterin dehydratase                                                                   | 1.71±0.06 | 5.7   | 20.9   | 7.39 |
| F4JW69                  | Phenylalanine ammonia-lyase                                                                                      | 1.98±0.17 | 2.01  | 76.63  | 6.51 |
| F4JPZ7                  | Peptidase M20/M25/M40 family protein                                                                             | 1.79±0.14 | 3.82  | 48.71  | 5.35 |
| F4J9F7                  | Cysteine synthase                                                                                                | 2.43±0.17 | 9.26  | 46.06  | 9.06 |
| B9DFR6                  | Cysteine synthase                                                                                                | 2.43±0.17 | 9.24  | 46.09  | 8.37 |
| B3H778                  | Arginosuccinate synthase family                                                                                  | 2.05±0.04 | 5.11  | 49     | 7.72 |
| B3H658                  | Branched-chain-amino-acid aminotransferase                                                                       | 2.43±0.02 | 2.43  | 44.7   | 8.1  |
| B3H5Y8                  | Glycine cleavage system P protein                                                                                | 2.05±0.09 | 1.74  | 106.16 | 6.99 |
| B3H5M0                  | Monodehydroascorbate reductase                                                                                   | 1.64±0.07 | 4.16  | 47.56  | 5.34 |
| B3H4D0                  | Glutathione S-transferase family protein                                                                         | 1.74±0.10 | 3.37  | 31.11  | 5.24 |
| C0Z2T9                  | 1-(5-phosphoribosyl)-5-[(5-phosphoribosylamino)methylideneamino]imidazole-4-carboxamide isomerase, chloroplastic | 1.93±0.50 | 3.59  | 24.7   | 8.73 |
| A0A1P8BGJ8              | Glutamate-1-semialdehyde-2,1-aminomutase                                                                         | 2.09±0.07 | 24.09 | 43.74  | 5.72 |
| A0A1P8BFA4              | Glutathione S-transferase family protein                                                                         | 0.58±0.03 | 3.35  | 31.14  | 5.4  |
| A0A1P8AZ64              | Glutamate decarboxylase                                                                                          | 2.08±0.34 | 6.42  | 62     | 7.53 |
| A0A1P8AUZ8              | 2-isopropylmalate synthase 1                                                                                     | 2.83±0.22 | 5.26  | 59.93  | 7.05 |
| A0A1P8AUR1              | Class I glutamine amidotransferase-like superfamily protein                                                      | 1.79±0.08 | 3.19  | 40.34  | 7.05 |
| A0A1P8AMY1              | 3-phosphoserine phosphatase                                                                                      | 1.98±0.36 | 3.58  | 31     | 6.96 |
| A0A1I9LQE0              | ATP-dependent caseinolytic (Clp) protease/crotonase family protein                                               | 2.01±0.20 | 3.49  | 37.79  | 8.05 |
| A0A178WBY7              | Glycine cleavage system H protein                                                                                | 2.17±0.10 | 5.42  | 17.89  | 5.19 |
| A0A178W962              | D-3-phosphoglycerate dehydrogenase                                                                               | 2.19±0.32 | 4.33  | 66.41  | 6.13 |
| A0A178VV72              | Glycine cleavage system H protein                                                                                | 2.17±0.10 | 5.45  | 17.94  | 5.34 |
| A0A178VU69              | Cysteine synthase                                                                                                | 2.34±0.11 | 9.95  | 41.63  | 8.02 |
| A0A178VB36              | MTO1                                                                                                             | 2.48±0.12 | 2.13  | 59.88  | 6.87 |
| A0A178V054              | Cysteine synthase                                                                                                | 1.77±0.07 | 26.09 | 33.78  | 6.14 |
| A0A178US70              | Phospho-2-dehydro-3-deoxyheptonate aldolase                                                                      | 2.35±0.09 | 4.14  | 56.11  | 8.78 |
| A0A178UA38              | Acyl-coenzyme A oxidase                                                                                          | 2.14±0.13 | 1.01  | 77.43  | 8.29 |
| <b>Lipid metabolism</b> |                                                                                                                  |           |       |        |      |
| Q9SIE3                  | At2g22230/T26C19.11                                                                                              | 1.66±0.06 | 5.45  | 24.23  | 8.48 |
| Q9C5N8                  | GDSL esterase/lipase At1g54020                                                                                   | 1.82±0.15 | 2.15  | 41.77  | 7.94 |

|                              |                                                                                |           |       |       |      |
|------------------------------|--------------------------------------------------------------------------------|-----------|-------|-------|------|
| Q94A94                       | Diaminopimelate decarboxylase 2, chloroplastic                                 | 2.12±0.10 | 3.89  | 54.13 | 6.67 |
| Q8RWZ3                       | Probable acyl-CoA dehydrogenase IBR3                                           | 1.77±0.18 | 3.76  | 91.66 | 8.32 |
| Q56WK6                       | Patellin-1                                                                     | 1.88±0.20 | 1.75  | 64.01 | 4.83 |
| Q42533                       | Biotin carboxyl carrier protein of acetyl-CoA carboxylase 1, chloroplastic     | 2.13±0.01 | 9.29  | 29.59 | 9.06 |
| Q42431                       | Oleosin 20.3 kDa                                                               | 2.06±0.41 | 13.09 | 20.3  | 7.58 |
| P56765                       | Acetyl-coenzyme A carboxylase carboxyl transferase subunit beta, chloroplastic | 2.47±0.04 | 5.12  | 55.6  | 6.24 |
| P10795                       | Ribulose biphosphate carboxylase small chain 1A, chloroplastic                 | 1.99±0.07 | 25.56 | 20.2  | 7.71 |
| B0FFQ6                       | AccD (Fragment)                                                                | 2.38±0.11 | 11.97 | 12.47 | 8.62 |
| A0A1B1W4V3                   | Acetyl-coenzyme A carboxylase carboxyl transferase subunit beta, chloroplastic | 2.47±0.04 | 5.12  | 55.57 | 6.24 |
| <b>Nucleotide metabolism</b> |                                                                                |           |       |       |      |
| Q9SYL9                       | 50S ribosomal protein L13, chloroplastic                                       | 2.04±0.16 | 7.88  | 26.77 | 9.92 |
| Q9M346                       | Fes1B                                                                          | 2.52±0.04 | 1.93  | 40.83 | 5.21 |
| Q9LVI9                       | Dihydropyrimidine dehydrogenase (NADP(+)), chloroplastic                       | 1.89±0.20 | 11.74 | 46.82 | 6.8  |
| Q96529                       | Adenylosuccinate synthetase, chloroplastic                                     | 1.99±0.25 | 16.33 | 52.93 | 7.14 |
| Q8GUN2                       | Adenylylsulfatase HINT1                                                        | 1.82±0.24 | 19.73 | 15.99 | 7.2  |
| F4HNZ6                       | Glyceraldehyde 3-phosphate dehydrogenase A subunit 2                           | 2.20±0.14 | 28.71 | 34.31 | 6.64 |
| A0A178VRA7                   | MORF6                                                                          | 1.62±0.01 | 3.45  | 26.35 | 8.9  |
| A0A178VD55                   | GOX2                                                                           | 2.06±0.44 | 27.35 | 40.91 | 8.76 |
| <b>Energy</b>                |                                                                                |           |       |       |      |
| Q9LZ66                       | Photosystem I reaction center subunit V, chloroplastic                         | 1.75±0.01 | 10    | 17.08 | 9.57 |
| Q9LRR9                       | ATP sulfurylase 4, chloroplastic                                               | 2.36±0.08 | 5.76  | 52.09 | 8.87 |
| Q9LR64                       | Assimilatory sulfite reductase (ferredoxin), chloroplastic                     | 1.98±0.01 | 7.63  | 71.91 | 8.31 |
| Q8S528                       | (S)-2-hydroxy-acid oxidase GLO1                                                | 2.06±0.11 | 31.34 | 40.32 | 9.13 |
| Q8LFU8                       | Photosystem II repair protein PSB27-H1, chloroplastic                          | 2.19±0.17 | 17.82 | 18.82 | 9.88 |
| Q42536                       | Aldehyde dehydrogenase family 2 member B7, mitochondrial                       | 2.13±0.03 | 4.49  | 58.12 | 7.33 |
| Q39243                       | Nitrilase 1                                                                    | 1.70±0.10 | 4.46  | 24.93 | 5.76 |
| Q39195                       | Thioredoxin reductase 1, mitochondrial                                         | 0.60±0.01 | 12    | 39.6  | 7.36 |
| P56771                       | Thioredoxin reductase 2                                                        | 2.44±0.21 | 4.18  | 40.61 | 6.7  |
| P23321                       | Oxygen-evolving enhancer protein 1-1, chloroplastic                            | 2.35±0.14 | 38.55 | 35.12 | 5.66 |
| O64530                       | Thiosulfate/3-mercaptopyruvate sulfurtransferase 1, mitochondrial              | 2.08±0.10 | 8.44  | 41.87 | 6.39 |
| O23324                       | ATP-sulfurylase 3, chloroplastic                                               | 2.11±0.01 | 8.17  | 52    | 7.4  |

|                       |                                                                                |           |       |       |      |
|-----------------------|--------------------------------------------------------------------------------|-----------|-------|-------|------|
| A8MR47                | Sulfurtransferase                                                              | 1.84±0.09 | 11.35 | 31.69 | 7.39 |
| A0A1P8B8I9            | Pseudouridine synthase/archaeosine<br>transglycosylase-like family protein     | 2.33±0.17 | 7.45  | 57.49 | 8.51 |
| A0A1P8AZS7            | Thioredoxin reductase                                                          | 2.53±0.16 | 4.43  | 38.23 | 8.12 |
| A0A1P8AU99            | Rhodanese homologue 2                                                          | 1.95±0.07 | 3.01  | 29.43 | 5.8  |
| A0A1P8AU81            | Rhodanese homologue 2                                                          | 1.95±0.07 | 2.76  | 32.13 | 6.8  |
| A0A178WKK0            | Sulfurtransferase                                                              | 2.06±0.09 | 9.94  | 35.61 | 5.25 |
| A0A178WAV9            | ASA1                                                                           | 2.18±0.14 | 3.57  | 53.6  | 6.61 |
| A0A178W876            | PSAD-2                                                                         | 2.18±0.05 | 16.18 | 22.29 | 9.77 |
| A0A178W5B2            | Sulfurtransferase                                                              | 1.95±0.07 | 2.52  | 34.7  | 5.27 |
| A0A178VGA9            | SOX                                                                            | 2.06±0.07 | 9.67  | 43.3  | 8.68 |
| A0A178VCV2            | APS1                                                                           | 1.79±0.02 | 12.31 | 51.43 | 6.81 |
| A0A178V1L3            | PDE332                                                                         | 2.02±0.04 | 10.68 | 25.65 | 9.06 |
| A0A178UY46            | PSBQA                                                                          | 1.82±0.20 | 10.31 | 23.78 | 9.64 |
| A0A178UX57            | PSII-Q                                                                         | 1.70±0.15 | 27.83 | 24.63 | 9.72 |
| A0A178UV45            | PSAD-1                                                                         | 2.18±0.05 | 15.87 | 22.58 | 9.77 |
| A0A178UF94            | SUPO1                                                                          | 2.26±0.13 | 10.81 | 43.48 | 6.46 |
| A0A178UER1            | PPa6                                                                           | 1.69±0.09 | 7.67  | 33.36 | 6.01 |
| A0A178UAM7            | ADK1                                                                           | 0.41±0.02 | 12.6  | 26.92 | 7.36 |
| <b>Defense/Stress</b> |                                                                                |           |       |       |      |
| Q9SMU8                | Peroxidase 34                                                                  | 1.66±0.06 | 1.98  | 38.81 | 7.64 |
| Q8RY71                | Epithiospecifier protein                                                       | 2.32±0.06 | 5.28  | 36.99 | 5.86 |
| Q39242                | Thioredoxin reductase 2                                                        | 2.23±0.08 | 4.18  | 40.61 | 6.7  |
| Q0WUH6                | Catalase                                                                       | 2.45±0.14 | 27.44 | 56.73 | 7.42 |
| P37702                | Myrosinase 1                                                                   | 1.83±0.05 | 3.88  | 61.09 | 5.92 |
| P25819                | Catalase-2                                                                     | 2.19±0.10 | 34.15 | 56.9  | 7.12 |
| P23686                | S-adenosylmethionine synthase 1                                                | 1.95±0.06 | 24.17 | 43.13 | 5.82 |
| O49326                | Nitrile-specifier protein 2                                                    | 2.14±0.24 | 4.46  | 51.18 | 5.76 |
| F4IQ05                | Peroxidase                                                                     | 1.79±0.19 | 5.41  | 33.25 | 7.68 |
| A0A178WB34            | Peroxidase                                                                     | 1.72±0.17 | 9.78  | 39.53 | 8.28 |
| Q9ZVF2                | MLP-like protein 329                                                           | 2.04±0.03 | 11.92 | 17.59 | 5.55 |
| Q8L9P7                | Type 2 peroxiredoxin, putative                                                 | 1.91±0.38 | 5.56  | 17.4  | 5.34 |
| Q9SSK9                | MLP-like protein 28                                                            | 2.14±0.13 | 4.78  | 37.59 | 5.34 |
| Q9SRY5                | Glutathione S-transferase F7                                                   | 2.03±0.01 | 3.83  | 23.58 | 6.62 |
| Q9LSY7                | Peroxidase 30                                                                  | 2.08±0.22 | 2.74  | 35.77 | 9.66 |
| Q9LIN0                | Major latex protein, putative                                                  | 2.04±0.03 | 4.61  | 17.78 | 5.15 |
| Q42580                | Peroxidase 21                                                                  | 1.81±0.01 | 4.89  | 36.72 | 7.4  |
| Q42328                | Defensin-like protein 195                                                      | 2.38±0.31 | 15.73 | 9.88  | 6.43 |
| P82281                | Thylakoid lumenal 29 kDa protein,<br>chloroplastic                             | 2.17±0.03 | 2.01  | 37.91 | 8.46 |
| P0DI10                | Peroxidase 1                                                                   | 2.08±0.22 | 2.77  | 35.6  | 9.25 |
| O48646                | Probable phospholipid hydroperoxide<br>glutathione peroxidase 6, mitochondrial | 2.24±0.18 | 8.62  | 25.57 | 9.35 |
| O23044                | Peroxidase 3                                                                   | 2.08±0.22 | 2.76  | 34.88 | 8.4  |

|                             |                                                                       |           |       |       |       |
|-----------------------------|-----------------------------------------------------------------------|-----------|-------|-------|-------|
| O22711                      | Peroxiredoxin-2D                                                      | 1.91±0.04 | 5.56  | 17.46 | 5.54  |
| F4I6Y3                      | MLP-like protein 28                                                   | 2.14±0.13 | 6.43  | 27.53 | 5.77  |
| F4HU93                      | Ascorbate peroxidase 1                                                | 2.01±0.01 | 31.73 | 27.5  | 6.29  |
| Q8LDJ8                      | Major latex protein, putative                                         | 2.04±0.44 | 4.61  | 17.69 | 5.16  |
| B3H4F3                      | MLP-like protein 28                                                   | 2.14±0.13 | 4.62  | 19.33 | 5.29  |
| A8MRH3                      | MLP-like protein 28                                                   | 2.14±0.13 | 3.98  | 22.55 | 4.93  |
| A8MR61                      | MLP-like protein 28                                                   | 2.14±0.13 | 2.78  | 32.26 | 5.27  |
| A0A1P8B8Y3                  | Ascorbate peroxidase 4                                                | 2.22±0.07 | 1.77  | 43.45 | 7.84  |
| A0A1P8B8W6                  | Ascorbate peroxidase 4                                                | 2.26±0.10 | 2.46  | 31.02 | 6.83  |
| A0A178WKG0                  | TPX2                                                                  | 1.91±0.04 | 5.56  | 17.4  | 5.54  |
| A0A178W5I1                  | MEE6                                                                  | 1.99±0.02 | 35.2  | 27.54 | 6.13  |
| A0A178VYY4                  | ZCE1                                                                  | 2.04±0.03 | 11.92 | 17.5  | 5.73  |
| A0A178UJR4                  | Peroxidase                                                            | 2.08±0.22 | 2.84  | 34.68 | 8.84  |
| Q9C5C2                      | Myrosinase 2                                                          | 2.27±0.38 | 4.02  | 62.69 | 7.44  |
| <b>Protein biosynthesis</b> |                                                                       |           |       |       |       |
| Q9SW09                      | 40S ribosomal protein S10-1                                           | 2.39±0.72 | 8.47  | 19.44 | 9.67  |
| Q9SRX2                      | 60S ribosomal protein L19-1                                           | 1.79±0.06 | 15.42 | 24.59 | 11.36 |
| Q9SIW5                      | 40S ribosomal protein S25-1                                           | 0.50±0.14 | 9.17  | 12.12 | 10.58 |
| Q9SIK2                      | 40S ribosomal protein S25-2                                           | 0.50±0.14 | 9.26  | 12.06 | 10.7  |
| Q9SI75                      | Elongation factor G, chloroplastic                                    | 1.94±0.04 | 10.86 | 86    | 5.6   |
| Q9SGA6                      | 40S ribosomal protein S19-1                                           | 2.47±0.05 | 53.85 | 15.82 | 10.08 |
| Q9SF53                      | 60S ribosomal protein L35-1                                           | 1.77±0.04 | 11.38 | 14.28 | 10.92 |
| Q9LVC9                      | 60S acidic ribosomal protein P3-2                                     | 2.49±0.04 | 15    | 11.86 | 4.51  |
| B9DH50                      | AT5G52650 protein                                                     | 2.39±0.72 | 8.38  | 19.47 | 9.51  |
| Q9LSA3                      | 60S ribosomal protein L30-3                                           | 1.84±0.10 | 29.46 | 12.27 | 9.69  |
| Q9FWS4                      | 50S ribosomal protein L31, chloroplastic                              | 2.09±0.45 | 20.83 | 16.02 | 9.8   |
| Q9FNP8                      | 40S ribosomal protein S19-3                                           | 2.68±0.07 | 25.87 | 15.69 | 10.21 |
| Q9FJP3                      | 50S ribosomal protein L29, chloroplastic                              | 3.01±0.03 | 12.72 | 19.37 | 10.51 |
| Q9FDZ9                      | 60S ribosomal protein L21-2                                           | 1.72±0.09 | 9.76  | 18.7  | 10.52 |
| Q9C9C6                      | 60S ribosomal protein L6-2                                            | 2.29±0.09 | 8.15  | 25.99 | 10.17 |
| Q9C7Y2                      | Multiple organellar RNA editing factor 5, chloroplastic/mitochondrial | 1.62±0.01 | 3.49  | 26.01 | 9.11  |
| Q93VI3                      | 60S ribosomal protein L17-1                                           | 2.16±0.04 | 20.45 | 19.89 | 10.11 |
| Q8W4A0                      | Eukaryotic translation initiation factor 3 subunit M                  | 2.11±0.25 | 5.04  | 46.76 | 5.12  |
| Q8VZB9                      | 60S ribosomal protein L10a-1                                          | 3.10±0.01 | 10.65 | 24.45 | 9.88  |
| Q6NPL0                      | At4g09040                                                             | 1.93±0.06 | 5.26  | 34.01 | 7.59  |
| Q5PNZ9                      | At1g22780                                                             | 1.94±0.13 | 17.76 | 17.53 | 10.54 |
| Q41969                      | Eukaryotic translation initiation factor 2 subunit beta               | 2.03±0.38 | 7.46  | 30.64 | 7.2   |
| P93014                      | 30S ribosomal protein S5, chloroplastic                               | 2.42±0.02 | 7.59  | 32.63 | 8.97  |
| P59231                      | 60S ribosomal protein L10a-3                                          | 2.81±0.23 | 10.6  | 24.52 | 9.82  |
| P57691                      | 60S acidic ribosomal protein P0-3                                     | 2.28±0.05 | 12.69 | 34.37 | 5.15  |
| P49209                      | 60S ribosomal protein L9-1                                            | 2.40±0.07 | 28.35 | 22    | 9.45  |

|                                        |                                                                                        |           |       |        |       |
|----------------------------------------|----------------------------------------------------------------------------------------|-----------|-------|--------|-------|
| P49200                                 | 40S ribosomal protein S20-1                                                            | 2.37±0.10 | 25    | 13.87  | 9.72  |
| P25864                                 | 50S ribosomal protein L9, chloroplastic                                                | 2.22±0.03 | 13.2  | 22.12  | 9.67  |
| P22738                                 | 60S ribosomal protein L3-2                                                             | 1.62±0.10 | 9.49  | 44.52  | 10.11 |
| A0A178VS42                             | MORF2                                                                                  | 0.62±0.40 | 3.65  | 24.7   | 8.24  |
| F4KAM0                                 | 60S acidic ribosomal protein family                                                    | 2.48±0.03 | 20.22 | 8.94   | 5.29  |
| F4JF64                                 | Clp ATPase                                                                             | 1.90±0.18 | 26.71 | 102.18 | 6.21  |
| F4J912                                 | Ribosomal protein L5                                                                   | 2.53±0.01 | 8.95  | 21.53  | 5.86  |
| F4J3P1                                 | Ribosomal protein L14p/L23e family protein                                             | 2.59±0.02 | 48.8  | 13.4   | 10.05 |
| F4IRF5                                 | Translation elongation factor EF1A/initiation factor IF2gamma family protein           | 1.81±0.23 | 1.91  | 51.3   | 8.72  |
| F4IHJ8                                 | Ribosomal protein S25 family protein                                                   | 0.65±0.01 | 9.35  | 11.93  | 10.68 |
| F4IGR3                                 | 60S acidic ribosomal protein family                                                    | 2.49±0.03 | 9.18  | 10.24  | 4.68  |
| F4IDD6                                 | tRNA synthetase beta subunit family protein                                            | 1.78±0.21 | 1.37  | 65.92  | 5.49  |
| B9DHP0                                 | AT4G27090 protein                                                                      | 1.99±0.27 | 22.39 | 15.5   | 10.04 |
| B9DGN3                                 | AT2G27710 protein                                                                      | 2.49±0.03 | 7.83  | 11.44  | 4.68  |
| B9DFS7                                 | AT4G00810 protein                                                                      | 1.97±0.11 | 15.93 | 11.3   | 4.32  |
| B3H4N7                                 | 60S acidic ribosomal protein family                                                    | 2.48±0.03 | 15.13 | 11.76  | 4.51  |
| A8MS54                                 | RNA-binding (RRM/RBD/RNP motifs) family protein                                        | 1.93±0.06 | 6.56  | 27.69  | 8.97  |
| A8MS28                                 | Ribosomal L27e protein family                                                          | 1.99±0.07 | 11.45 | 15.03  | 10.15 |
| A8MQR4                                 | 60S acidic ribosomal protein P0                                                        | 2.47±0.05 | 11.15 | 30.6   | 4.84  |
| A8MQK8                                 | 60S acidic ribosomal protein family                                                    | 2.11±0.22 | 18.75 | 9.99   | 4.36  |
| A0A1B1W4Y0                             | 50S ribosomal protein L14, chloroplastic                                               | 1.92±0.12 | 21.31 | 13.57  | 9.29  |
| A0A1B1W4X5                             | 30S ribosomal protein S19, chloroplastic                                               | 1.75±0.05 | 11.96 | 10.6   | 10.77 |
| A0A1B1W4U6                             | 30S ribosomal protein S4, chloroplastic                                                | 2.96±0.01 | 7.46  | 23.23  | 10.33 |
| A0A1B1W4T3                             | 30S ribosomal protein S2, chloroplastic                                                | 1.81±0.17 | 3.81  | 26.89  | 9.66  |
| A0A178W9Y0                             | 40S ribosomal protein S12                                                              | 1.89±0.01 | 19.44 | 15.37  | 5.55  |
| A0A178W979                             | Emb2394                                                                                | 2.55±0.01 | 13.45 | 24.69  | 9.89  |
| A0A178W1V2                             | Ribosomal protein                                                                      | 2.78±0.26 | 10.65 | 24.41  | 9.88  |
| A0A178VWL0                             | RPL16A                                                                                 | 2.34±0.10 | 17.58 | 20.82  | 9.92  |
| A0A178VS27                             | Tubulin beta chain                                                                     | 2.29±0.10 | 34.3  | 50.71  | 4.83  |
| A0A178VA06                             | HSP93-III                                                                              | 1.90±0.18 | 25.84 | 105.77 | 6.51  |
| A0A178V891                             | RPL5A                                                                                  | 2.47±0.05 | 11.3  | 34.34  | 9.31  |
| A0A178V6A2                             | 60S ribosomal protein L13                                                              | 2.90±0.03 | 3.88  | 23.49  | 10.55 |
| A0A178UKM5                             | Tubulin beta chain                                                                     | 2.39±0.02 | 34.3  | 50.57  | 4.83  |
| A0A178UJU5                             | RPL5B                                                                                  | 2.62±0.08 | 11.3  | 34.42  | 9.17  |
| A0A178UDQ8                             | EMB1401                                                                                | 2.03±0.38 | 7.46  | 30.61  | 7.2   |
| Q42061                                 | Ribosomal protein PO (Fragment)                                                        | 1.87±0.16 | 11.54 | 8.65   | 9.64  |
| <b>Protein destination and storage</b> |                                                                                        |           |       |        |       |
| Q0WZN5                                 | 5-methyltetrahydropteroyltriglutamate--homocysteine methyltransferase 3, chloroplastic | 2.07±0.07 | 6.65  | 90.54  | 8.05  |
| <b>Protein folding and degradation</b> |                                                                                        |           |       |        |       |
| Q9SYG1                                 | 17.4 kDa class III heat shock protein                                                  | 2.33±0.14 | 7.1   | 17.35  | 8.29  |

|                                              |                                                                           |           |       |        |      |
|----------------------------------------------|---------------------------------------------------------------------------|-----------|-------|--------|------|
| Q9SHH8                                       | Glutathione S-transferase U26                                             | 3.55±0.27 | 5.45  | 25.76  | 5.72 |
| Q9FPT1                                       | Ubiquitin carboxyl-terminal hydrolase 12                                  | 1.81±0.25 | 0.72  | 130.53 | 5.77 |
| Q94AW8                                       | Chaperone protein DNA 3                                                   | 2.50±0.03 | 8.33  | 46.42  | 6.11 |
| A0A178UDF7                                   | Peptidylprolyl isomerase                                                  | 1.60±0.06 | 18.28 | 61.57  | 5.29 |
| Q8GYM1                                       | Glutathione S-transferase U22                                             | 2.04±0.01 | 10.55 | 25.27  | 5.27 |
| Q6NLB0                                       | Glutathione S-transferase L1                                              | 2.21±0.04 | 3.8   | 27.15  | 5.1  |
| Q38798                                       | Calnexin homolog 2                                                        | 2.58±0.09 | 8.65  | 60.45  | 4.83 |
| P29402                                       | Calnexin homolog 1                                                        | 2.58±0.09 | 16.23 | 60.45  | 4.91 |
| P19036                                       | 17.4 kDa class I heat shock protein                                       | 2.51±0.08 | 21.15 | 17.43  | 5.29 |
| P13853                                       | 17.6 kDa class I heat shock protein 3                                     | 3.07±0.12 | 15.29 | 17.59  | 5.47 |
| F4K6M8                                       | Calreticulin family protein                                               | 2.49±0.02 | 8.52  | 61.38  | 4.86 |
| F4K3X1                                       | Ubiquitin-specific protease 12                                            | 1.81±0.25 | 0.81  | 115.08 | 5.68 |
| F4J1V2                                       | DNAJ homologue 3                                                          | 2.41±0.05 | 10.2  | 37.65  | 8.18 |
| F4I529                                       | Calreticulin                                                              | 2.96±0.09 | 9.2   | 49.11  | 5.8  |
| A0A178W6I8                                   | Calreticulin                                                              | 2.96±0.09 | 9.18  | 48.5   | 4.6  |
| A0A178UJA2                                   | At5g22060                                                                 | 2.33±0.11 | 8.35  | 46.41  | 7.12 |
| <b>Secondary metabolism</b>                  |                                                                           |           |       |        |      |
| Q9SR37                                       | Beta-glucosidase 23                                                       | 1.96±0.14 | 5.73  | 59.68  | 6.92 |
| Q9SLA0                                       | Beta-glucosidase 14                                                       | 2.50±0.07 | 1.64  | 54.98  | 8.48 |
| Q9LU02                                       | Beta-glucosidase 13                                                       | 2.50±0.07 | 1.58  | 56.92  | 8.76 |
| Q9FVP6                                       | 3-phosphoshikimate 1-carboxyvinyltransferase                              | 1.79±0.23 | 2.88  | 55.8   | 6.79 |
| Q9FH03                                       | Beta-glucosidase 12                                                       | 2.40±0.01 | 1.58  | 56.93  | 8.57 |
| Q8LEF4                                       | S-adenosylmethionine synthase 1                                           | 0.51±0.01 | 24.17 | 43.13  | 5.82 |
| Q94AR8                                       | 3-isopropylmalate dehydrogenase                                           | 0.44±0.09 | 10.15 | 43.27  | 6.06 |
| Q0WP12                                       | Thiocyanate methyltransferase 1                                           | 1.82±0.06 | 11.79 | 27.39  | 4.64 |
| P46010                                       | Nitrilase 3                                                               | 1.90±0.09 | 4.91  | 38     | 5.95 |
| P29976                                       | Phospho-2-dehydro-3-deoxyheptonate aldolase 1, chloroplastic              | 2.39±0.06 | 10.1  | 57.94  | 8.06 |
| O64879                                       | Beta-glucosidase 15                                                       | 2.40±0.01 | 1.58  | 56.87  | 7.71 |
| <b>Signal transduction and transcription</b> |                                                                           |           |       |        |      |
| Q9FLM8                                       | DNA-directed RNA polymerases II, IV and V subunit 12                      | 1.68±0.01 | 13.73 | 5.89   | 8.18 |
| Q42546                                       | SAL1 phosphatase                                                          | 2.22±0.10 | 12.46 | 37.54  | 5.17 |
| O80774                                       | AT2G34250 protein                                                         | 2.59±0.14 | 2.11  | 52.06  | 9    |
| <b>Transport</b>                             |                                                                           |           |       |        |      |
| Q9STR3                                       | Copia-like retroelement pol polyprotein                                   | 2.17±0.08 | 7.38  | 13.9   | 9.03 |
| Q9LW76                                       | Ras-related protein RABG3c                                                | 2.14±0.02 | 16.99 | 23     | 5.52 |
| Q9FKS5                                       | Cytochrome c1 2, heme protein, mitochondrial                              | 2.43±0.32 | 9.77  | 33.67  | 6.18 |
| Q9C820                                       | Ras-related protein RABG3d                                                | 2.14±0.02 | 16.99 | 23.05  | 5.33 |
| Q96252                                       | ATP synthase subunit delta', mitochondrial                                | 2.06±0.09 | 4.93  | 21.53  | 6.7  |
| Q8LBZ7                                       | Succinate dehydrogenase [ubiquinone] iron-sulfur subunit 1, mitochondrial | 2.12±0.02 | 9.32  | 31.15  | 8.44 |
| Q8LB02                                       | Succinate dehydrogenase [ubiquinone] iron-sulfur subunit 2, mitochondrial | 2.12±0.02 | 9.29  | 31.12  | 8.62 |



|                             |                                                                               |           |       |        |      |
|-----------------------------|-------------------------------------------------------------------------------|-----------|-------|--------|------|
| Q8L7C9                      | Glutathione S-transferase U20                                                 | 2.30±0.02 | 8.76  | 24.99  | 5.78 |
| Q8HT11                      | Photosystem II CP43 reaction center protein                                   | 1.76±0.21 | 3.5   | 43.97  | 7.59 |
| Q42599                      | NADH dehydrogenase [ubiquinone] iron-sulfur protein 8-A, mitochondrial        | 2.08±0.26 | 9.46  | 25.49  | 5.41 |
| Q3E6Q3                      | Ras-related small GTP-binding family protein                                  | 2.18±0.06 | 28.69 | 13.82  | 5.07 |
| Q38814                      | Thiamine thiazole synthase, chloroplastic                                     | 2.16±0.03 | 13.47 | 36.64  | 6.23 |
| Q24JL3                      | Thiosulfate/3-mercaptopyruvate sulfurtransferase 2                            | 2.03±0.13 | 2.34  | 37.39  | 6.13 |
| O82629                      | V-type proton ATPase subunit G2                                               | 2.16±0.16 | 16.04 | 11.74  | 5.58 |
| O80852                      | Glutathione S-transferase F9                                                  | 2.18±0.07 | 22.79 | 24.13  | 6.65 |
| A0A1B1W4Y4                  | Photosystem I iron-sulfur center                                              | 0.55±0.06 | 82.72 | 9.03   | 7.08 |
| A0A1B1W4U2                  | Photosystem I P700 chlorophyll a apoprotein A2                                | 1.98±0.28 | 3.41  | 82.42  | 7.4  |
| A0A1B1W4S7                  | Photosystem II protein D1                                                     | 1.99±0.20 | 3.12  | 38.91  | 5.25 |
| Q38922                      | Ras-related protein RABB1b                                                    | 1.81±0.08 | 6.16  | 23.16  | 7.01 |
| P92963                      | Ras-related protein RABB1c                                                    | 1.81±0.08 | 6.16  | 23.15  | 7.42 |
| O23016                      | Probable voltage-gated potassium channel subunit beta                         | 1.73±0.15 | 10.98 | 36.52  | 7.42 |
| A0A1P8AV04                  | 2-isopropylmalate synthase 1                                                  | 2.35±0.17 | 6     | 52.45  | 8.07 |
| <b>Cell growth/Division</b> |                                                                               |           |       |        |      |
| Q56ZI2                      | Patellin-2                                                                    | 1.88±0.20 | 1.46  | 75.96  | 4.92 |
| P32962                      | Nitrilase 2                                                                   | 2.34±0.05 | 5.01  | 37.13  | 5.55 |
| P32961                      | Nitrilase 1                                                                   | 2.26±0.11 | 2.89  | 38.13  | 6.28 |
| Q9C8L4                      | Persulfide dioxygenase ETHE1 homolog, mitochondrial                           | 2.22±0.06 | 12.93 | 32.31  | 7.01 |
| Q944K2                      | Dolichyl-diphosphooligosaccharide--protein glycosyltransferase 48 kDa subunit | 2.42±0.11 | 4.12  | 48.71  | 6.34 |
| O80476                      | Methylesterase 2                                                              | 1.73±0.10 | 5.7   | 29.65  | 5.34 |
| <b>Other</b>                |                                                                               |           |       |        |      |
| Q9ZUC1                      | NADPH-dependent alkenal/one oxidoreductase, chloroplastic                     | 1.68±0.03 | 14.25 | 40.96  | 8.35 |
| Q9SXJ7                      | Chaperone protein ClpC2, chloroplastic                                        | 1.90±0.18 | 25.84 | 105.67 | 6.42 |
| Q9SUR0                      | AT4G23670 protein                                                             | 2.04±0.03 | 4.64  | 17.51  | 6.37 |
| Q9SR59                      | Monodehydroascorbate reductase 3                                              | 1.64±0.09 | 4.08  | 48.33  | 5.27 |
| Q9SPK5                      | Formate--tetrahydrofolate ligase                                              | 2.05±0.08 | 11.04 | 67.76  | 6.71 |
| Q9SKI0                      | At2g10940/F15K19.1                                                            | 1.92±0.02 | 7.56  | 29.63  | 9.39 |
| Q9LVM3                      | YCF54                                                                         | 1.88±0.23 | 7.58  | 24.09  | 8.1  |
| Q9LRS0                      | (S)-2-hydroxy-acid oxidase GLO2                                               | 2.06±0.44 | 32.97 | 40.28  | 8.97 |
| Q9FE63                      | Profilin-5                                                                    | 2.10±0.06 | 9.92  | 14.03  | 4.81 |
| Q9C5B9                      | Probable aldo-keto reductase 1                                                | 1.79±0.02 | 3.2   | 37.57  | 6.46 |
| Q38905                      | Profilin-4                                                                    | 2.10±0.06 | 9.7   | 14.54  | 5.2  |

|            |                                                                        |           |       |        |       |
|------------|------------------------------------------------------------------------|-----------|-------|--------|-------|
| P42799     | Glutamate-1-semialdehyde 2,1-aminomutase 1, chloroplastic              | 2.05±0.04 | 25.32 | 50.34  | 6.87  |
| O82209     | Copia-like retroelement pol polyprotein                                | 2.12±0.04 | 7.38  | 13.84  | 9.04  |
| O80585     | Methylenetetrahydrofolate reductase 2                                  | 2.06±0.01 | 3.2   | 66.76  | 5.5   |
| O23404     | Pyruvate, phosphate dikinase 1, chloroplastic                          | 2.14±0.16 | 8.31  | 105.07 | 6.38  |
| O22824     | Formin-like protein 2                                                  | 1.85±0.05 | 0.78  | 98.26  | 7.9   |
| Q8LEB8     | Quinone oxidoreductase-like protein                                    | 1.94±0.17 | 16.83 | 32.71  | 6.16  |
| F4JTD3     | RNA binding Plectin/S10 domain-containing protein                      | 2.39±0.72 | 10.07 | 16.36  | 9.48  |
| F4JKY6     | Alpha/beta-Hydrolases superfamily protein                              | 1.92±0.01 | 3.2   | 43.03  | 8.19  |
| F4JKM2     | Cinnamyl alcohol dehydrogenase 5                                       | 1.68±0.07 | 2.8   | 38.69  | 5.44  |
| F4JBZ5     | Sulfite oxidase                                                        | 1.91±0.03 | 12.75 | 32.66  | 7.03  |
| F4J2B4     | Proteasome component (PCI) domain protein                              | 2.11±0.26 | 5.77  | 41.13  | 5.07  |
| F4HRK0     | Glyoxalase II 3                                                        | 2.30±0.01 | 7.48  | 32.34  | 7.01  |
| O23444     | Putative epoxide hydrolase                                             | 1.92±0.41 | 2.24  | 61     | 8.51  |
| B3H4B6     | Ribosomal protein S25 family protein                                   | 0.54±0.11 | 21.5  | 11.92  | 10.68 |
| B2CT35     | APS1 (Fragment)                                                        | 1.79±0.03 | 23.38 | 16.92  | 6.33  |
| B2CT32     | APS1 (Fragment)                                                        | 1.79±0.03 | 23.38 | 16.89  | 6.33  |
| B2CT25     | APS1 (Fragment)                                                        | 1.79±0.03 | 23.38 | 16.92  | 6.81  |
| B2CT24     | APS1 (Fragment)                                                        | 1.79±0.02 | 23.38 | 16.9   | 6.33  |
| B0LZ83     | Phenylalanine ammonia-lyase                                            | 2.13±0.05 | 7.25  | 21.54  | 6.61  |
| B0LZ74     | Phenylalanine ammonia-lyase                                            | 2.13±0.05 | 7.18  | 21.74  | 6.61  |
| A8MRF8     | Sulfite oxidase                                                        | 1.89±0.05 | 12.03 | 26.63  | 5.44  |
| A0A1P8BFI1 | UDP-glucuronic acid decarboxylase 3                                    | 2.04±0.11 | 47.28 | 35.41  | 7.17  |
| A0A1P8AZM5 | Alpha/beta-Hydrolases superfamily protein                              | 1.71±0.05 | 3.11  | 24.32  | 5.6   |
| A0A1P8AXW0 | Acetone-cyanohydrin lyase                                              | 1.73±0.10 | 8.02  | 20.82  | 6.42  |
| A0A1P8AXQ5 | Acetone-cyanohydrin lyase                                              | 1.73±0.10 | 5.4   | 31.38  | 5.74  |
| A0A1P8AWD7 | NAD(P)-linked oxidoreductase superfamily protein                       | 1.79±0.02 | 4.31  | 27.82  | 6.4   |
| A0A1P8AS42 | Glyoxylate reductase 2                                                 | 1.97±0.03 | 19.73 | 31.26  | 5.54  |
| A0A1P8AQG6 | Aldehyde dehydrogenase 2B7                                             | 2.24±0.04 | 5.88  | 44.45  | 7.83  |
| A0A178WCX5 | NADH dehydrogenase [ubiquinone] iron-sulfur protein 8-B, mitochondrial | 2.22±0.37 | 4.05  | 25.36  | 2.29  |
| A0A178UA34 | S10_pectin domain-containing protein                                   | 2.39±0.72 | 8.83  | 19.54  | 9.61  |
| A0A1P8ANK1 | PATELLIN 2                                                             | 1.88±0.20 | 1.54  | 72.34  | 4.97  |
| A0A178V7U7 | Oleosin                                                                | 2.06±0.41 | 17.61 | 14.88  | 7.42  |
| A0A1I9LS90 | Photosystem II subunit T                                               | 1.60±0.01 | 12.59 | 15.62  | 9.63  |
| A0A1I9LNM7 | Fes1B                                                                  | 2.56±0.07 | 2.16  | 36.48  | 5.31  |
| A0A178WPQ4 | COX6B                                                                  | 2.18±0.10 | 4.71  | 21.18  | 4.34  |
| A0A178WM95 | GR2                                                                    | 1.97±0.03 | 16.48 | 37.76  | 8.44  |
| A0A178W1J5 | MEE4                                                                   | 2.41±0.29 | 9.79  | 16.12  | 9.2   |
| A0A178VQZ7 | S-formylglutathione hydrolase                                          | 1.74±0.15 | 7.39  | 31.64  | 6.37  |
| A0A178VHC7 | GSA2                                                                   | 2.42±0.26 | 22.67 | 50.11  | 7.39  |
| A0A178V3B0 | CAD5                                                                   | 1.68±0.07 | 2.8   | 38.72  | 5.67  |

---

|            |         |           |       |       |      |
|------------|---------|-----------|-------|-------|------|
| A0A178UES7 | HSP18.2 | 2.44±0.08 | 9.94  | 18.12 | 7.42 |
| A0A178UA73 | OLEO2   | 1.98±0.39 | 10.05 | 21.27 | 9.36 |

---

Note: The result was expressed as mean of three biology replications. <sup>a</sup>Accession No., Accession number according to the UniProtKB database, accessed on 10 July 2022; <sup>b</sup>Description, Homologue protein name obtained using *Arabidopsis* database from the UniProtKB, accessed on 10 July 2022; <sup>c</sup>Cove, coverage; <sup>d</sup>MW, theoretical molecular weight; <sup>e</sup>TpI, theoretical isoelectric point; C: control; Se: 0.10 mM Na<sub>2</sub>SeO<sub>3</sub>
